# Supplementary material for: Magnetron sputtered ZnO electron transporting layers for high performance perovskite solar cells
Source: Royal Society of Chemistry journal article supplement (doi:10.1039/d1dt00344e), 2021-01-01
Supplement: d1dt00344e1.pdf [file d1dt00344e1.pdf]

## Supporting Information

### **Magnetron sputtered ZnO electron transporting layers for high performance perovskite solar cells**

Haihong Niu<sup>1</sup>, Cunlong Fang<sup>1</sup>, Xiantao Wei<sup>2</sup>, Huan Wang<sup>1</sup>, Lei Wan<sup>1</sup>, Yuan Li<sup>3</sup>, Xiaoli Mao<sup>3</sup>, Jinzhang Xu<sup>1</sup>, and Ru Zhou<sup>1\*</sup>

<sup>1</sup> School of Electrical Engineering and Automation, Hefei University of Technology, Hefei 230009, P. R. China

<sup>2</sup> School of Physical Sciences, University of Science and Technology of China, Hefei 230026, P. R. China

<sup>3</sup> School of Electronic Science and Applied Physics, Hefei University of Technology, Hefei 230009, P. R. China

---

\* Corresponding author:

[zhouru@hfut.edu.cn](mailto:zhouru@hfut.edu.cn) (Ru Zhou);

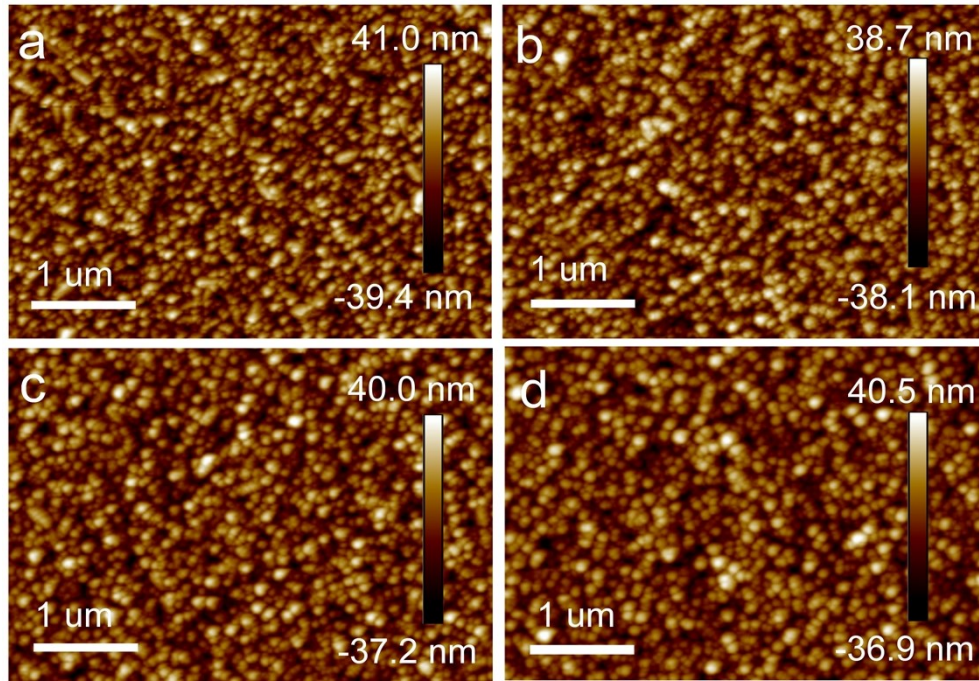

**Figure S1** AFM images of (a) the bare FTO substrate and the sputtered ZnO films deposited under different sputtering time of (b) 1 min, (c) 2 min, and (d) 4 min.

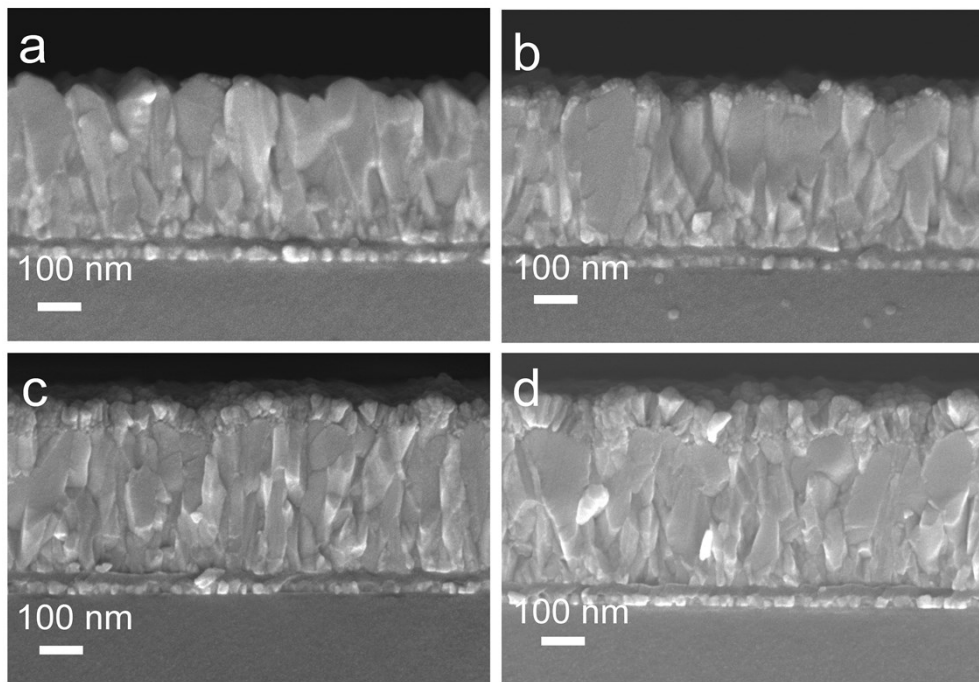

**Figure S2** Cross-sectional SEM images of (a) the bare FTO substrate and sputtered ZnO films deposited under various sputtering time of (b) 1 min, (c) 2 min, and (d) 4 min.

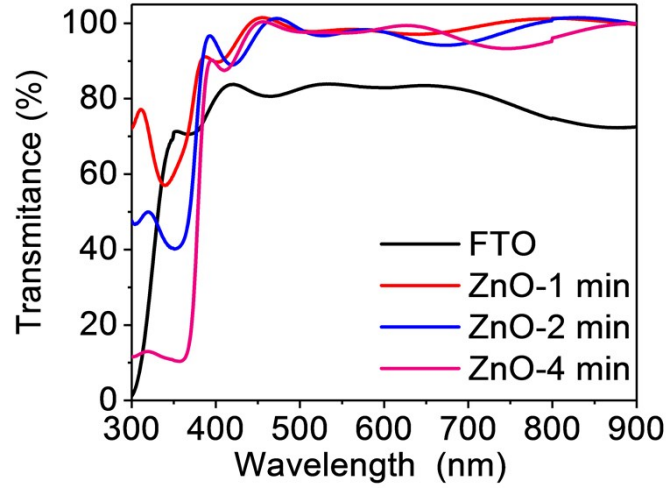

**Figure S3** Optical transmittance spectra of (a) the bare FTO substrate and sputtered ZnO films deposited under various sputtering time of (b) 1 min, (c) 2 min, and (d) 4 min.

**Table S1** The photovoltaic parameters derived from  $J$ - $V$  curves of PSCs based on the sputtered and spin-coated ZnO ETLs, measured under the illumination of One Sun (AM1.5,  $100 \text{ mW cm}^{-2}$ ).

| Device          | $V_{oc}$ (V) | $J_{sc}$ ( $\text{mA/cm}^2$ ) | FF (%) | $\eta$ (%) | $R_s$ ( $\Omega$ ) | $R_{sh}$ ( $\Omega$ ) |
|-----------------|--------------|-------------------------------|--------|------------|--------------------|-----------------------|
| ZnO-1 min       | 1.11         | 15.69                         | 60.37  | 10.54      | 72.61              | 3158.36               |
| ZnO-2 min       | 1.13         | 17.29                         | 66.92  | 13.04      | 51.49              | 3922.63               |
| ZnO-4 min       | 1.06         | 9.64                          | 40.77  | 4.15       | 234.31             | 1705.35               |
| Spin-coated ZnO | 1.06         | 16.35                         | 48.00  | 8.34       | 215.24             | 4910.14               |

**Table S2** The stability measurements of PSCs based on the sputtered and spin-coated ZnO ETLs. The photovoltaic parameters were derived from  $J$ - $V$  curves measured under the illumination of one sun (AM1.5,  $100 \text{ mW cm}^{-2}$ ).

| Device        |         | $V_{oc}$ (V) | $J_{sc}$ ( $\text{mA/cm}^2$ ) | FF (%) | $\eta$ (%) | $R_s$ ( $\Omega$ ) | $R_{sh}$ ( $\Omega$ ) |
|---------------|---------|--------------|-------------------------------|--------|------------|--------------------|-----------------------|
| Sputtered ZnO | 1 day   | 1.13         | 17.29                         | 66.92  | 13.04      | 51.49              | 3922.63               |
|               | 20 day  | 1.11         | 16.40                         | 61.58  | 11.26      | 55.38              | 3243.19               |
|               | 180 day | 1.10         | 14.83                         | 62.66  | 10.20      | 68.58              | 3930.99               |

|             |         |      |       |       |      |        |         |
|-------------|---------|------|-------|-------|------|--------|---------|
|             | 1 day   | 1.06 | 16.35 | 48.00 | 8.34 | 215.24 | 4910.14 |
| Spin-coated | 20 day  | 1.00 | 13.18 | 37.97 | 4.98 | 248.30 | 1401.07 |
| ZnO         | 180 day | 0.85 | 3.96  | 44.15 | 1.48 | 543.79 | 3899.58 |

**Table S3** The fitted parameters of the impedance spectra for ZnO and ZnO/SnO<sub>2</sub> based PSCs.

| Device               | $R_s$ ( $\Omega$ ) | $R_{rec}$ ( $\Omega$ ) | CPE-T (F)             | CPE-T (F) |
|----------------------|--------------------|------------------------|-----------------------|-----------|
| ZnO                  | 5.79               | 94990                  | $7.95 \times 10^{-8}$ | 0.79      |
| ZnO/SnO <sub>2</sub> | 2.60               | 116400                 | $1.06 \times 10^{-7}$ | 0.77      |
